# Supplementary material for: Detecting Cognitive Traits and Occupational Proficiency Using EEG and Statistical Inference
Source: Research Square preprint supplement (doi:10.21203/rs.3.rs-3272917/v1), 2023-08-30

1. List of discarded channels

'E8', 'E14', 'E17', 'E21', 'E25', 'E43', 'E44','E48', 'E49', 'E56', 'E57', 'E63', 'E64', 'E65', 'E68', 'E69', 'E73', 'E74', 'E81', 'E82', 'E88', 'E89', 'E90', 'E94', 'E95', 'E99', 'E100', 'E107', 'E113', 'E114', 'E119', 'E120', 'E125', 'E126', 'E127', ‘E128'

2. ROC plots, AUCs, filters and patterns of CSP corresponding to the largest eigenvalue for each type of task


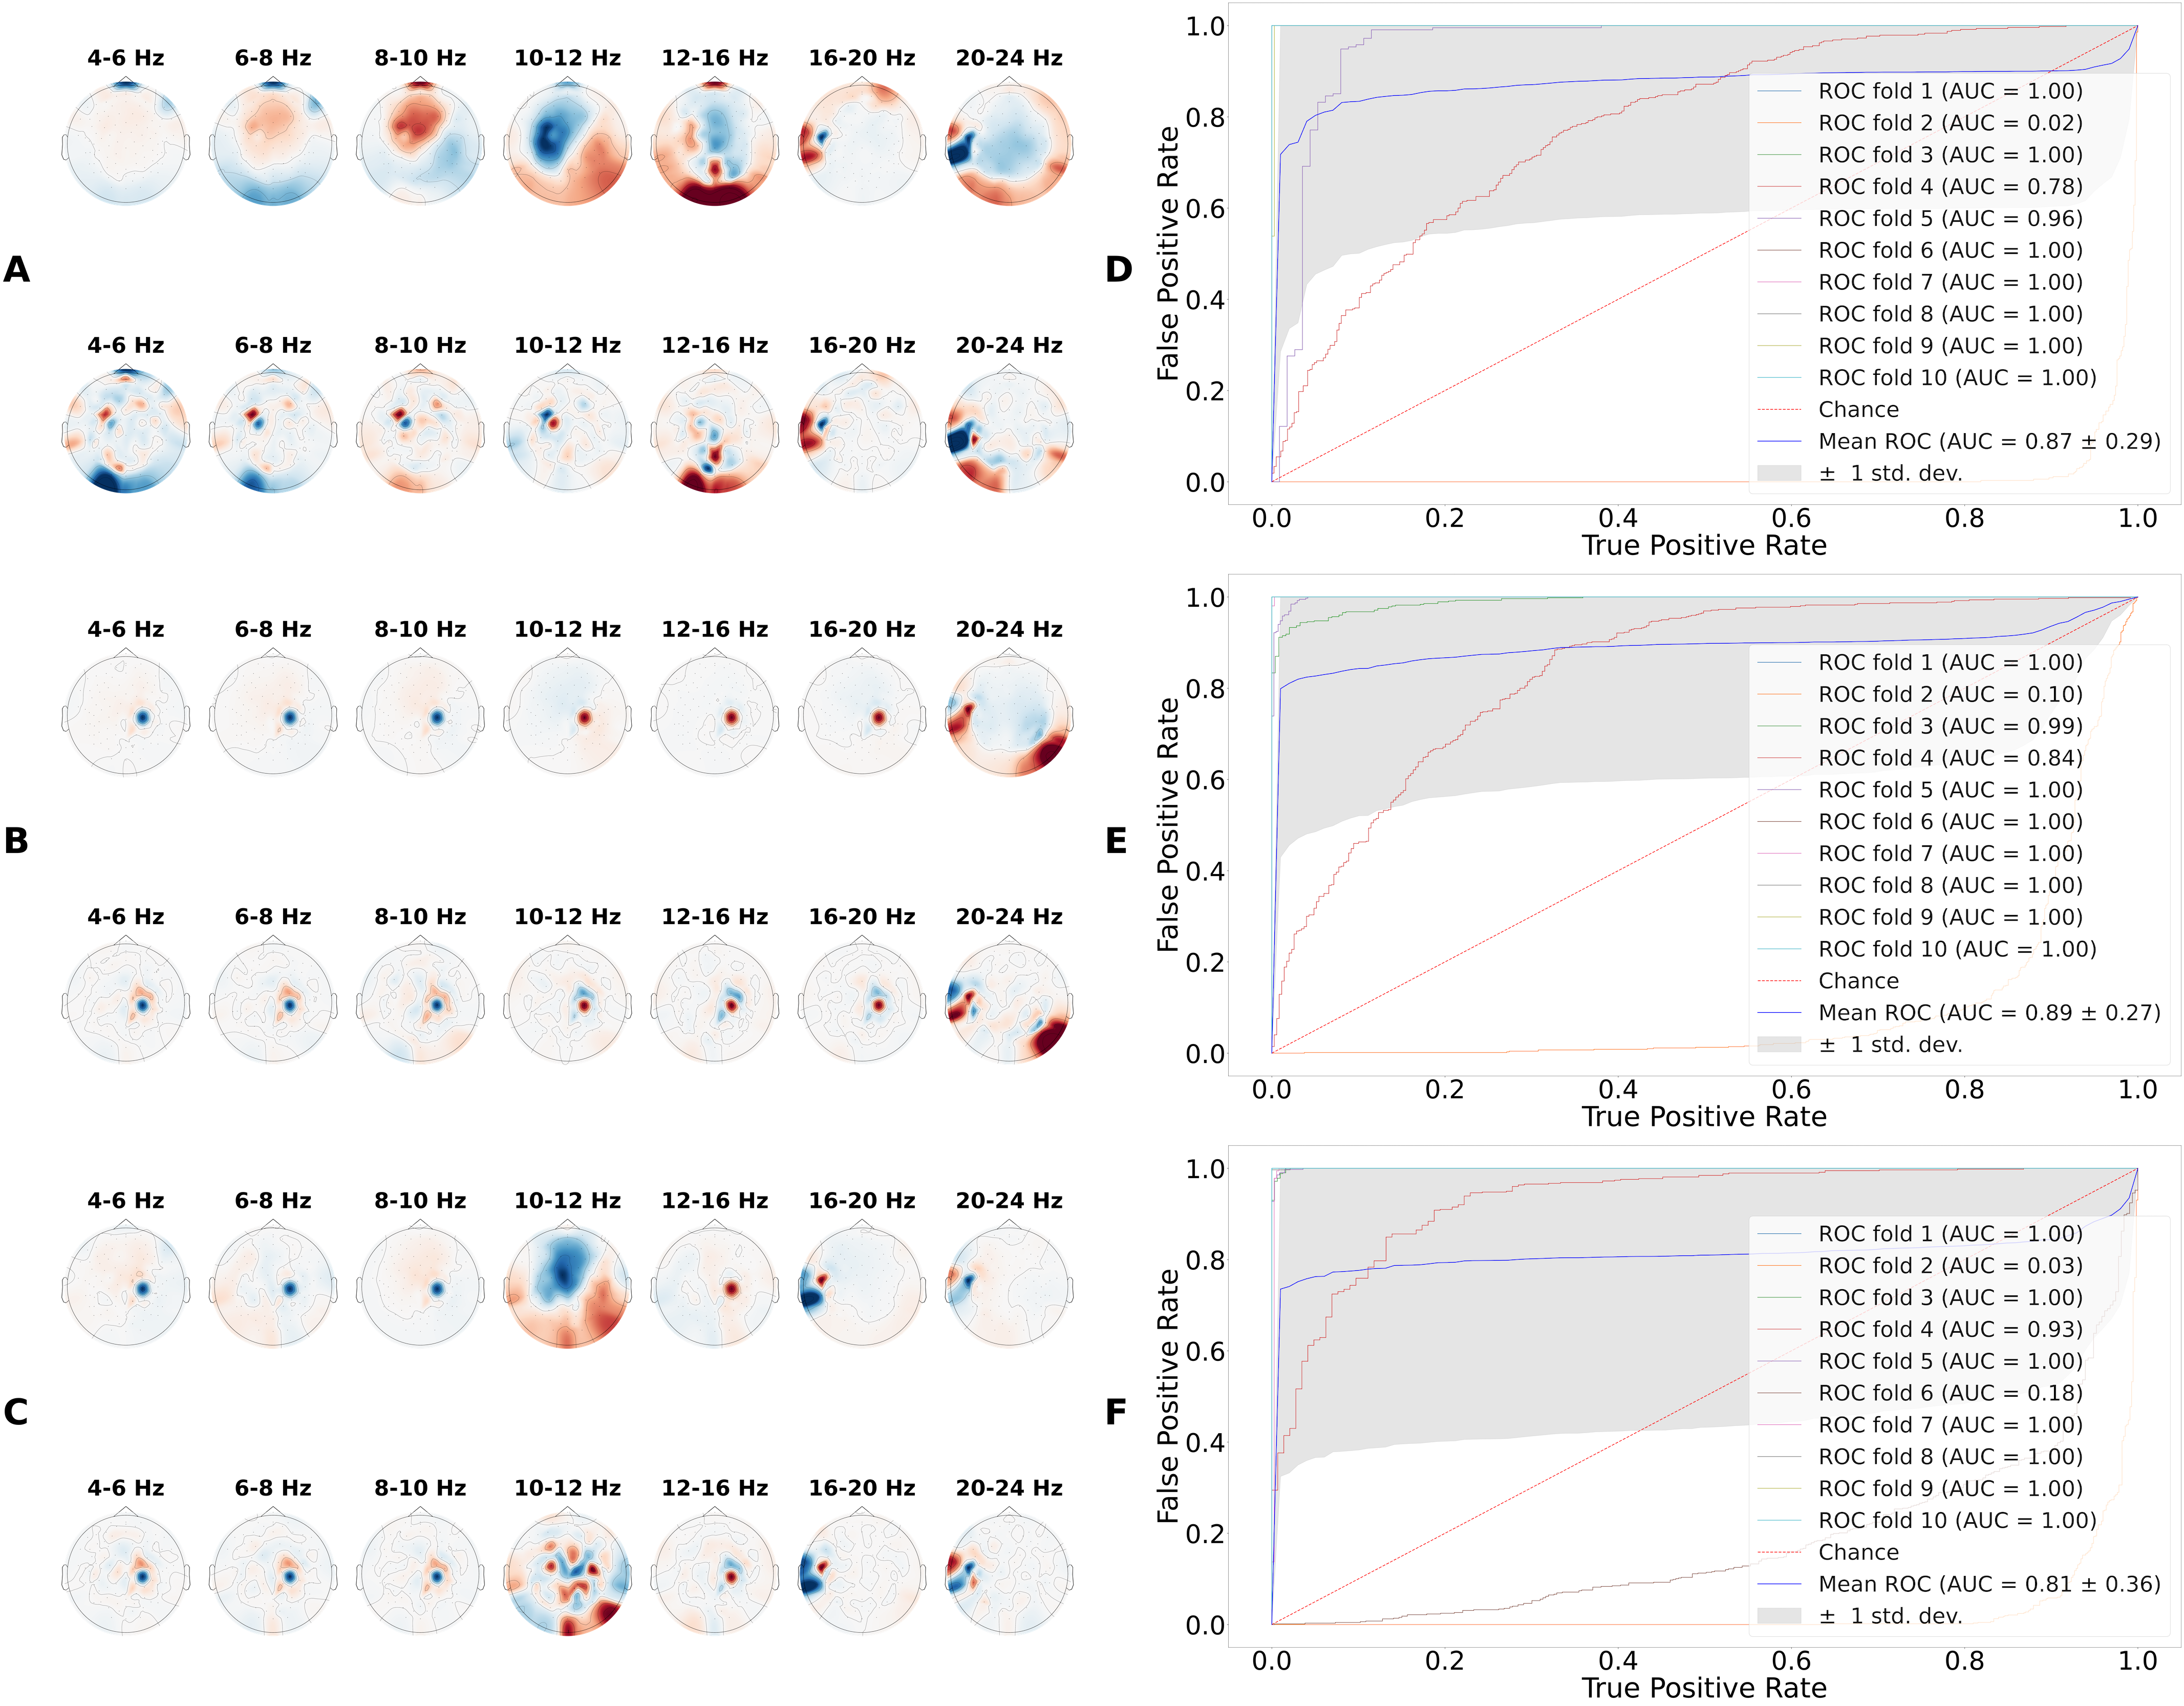

Supplement: Supplementary file 1 [file f90a079734954688ba5f7dff.docx]
